# Supplementary material for: Understanding ion diffusion in anion exchange membranes; effects of morphology and mobility of pendant cationic groups
Source: Royal Society of Chemistry journal article supplement (doi:10.1039/d2ta04400e), 2022-01-01
Supplement: d2ta04400e1.pdf [file d2ta04400e1.pdf]

## Supporting Information for:

### Understanding Ion Diffusion in Anion Exchange Membranes; Effects of Morphology and, Mobility of Pendant Cationic Groups

Mohammad Rezayani <sup>a</sup>, Farhad Sharif <sup>a\*</sup>, Hesam Makki <sup>b\*</sup>

<sup>a</sup>. Department of Polymer and Color Engineering, Amirkabir University of Technology, 424 Hafez Ave.,  
Tehran, Iran.

<sup>b</sup>. Department of Chemistry and Materials Innovation Factory, University of Liverpool, Liverpool L69  
7ZD, U.K.

# Contents

|                                                                                   |            |
|-----------------------------------------------------------------------------------|------------|
| <b>1- DFT calculations.....</b>                                                   | <b>S1</b>  |
| 1-1 Calculation method of partial charges.....                                    | S1         |
| 1-2 System size analysis.....                                                     | S2         |
| <b>2- System compositions.....</b>                                                | <b>S3</b>  |
| <b>3- system equilibration.....</b>                                               | <b>S4</b>  |
| 3-1 Equilibration process for hydrated membranes.....                             | S4         |
| 3-2 Radius of gyration autocorrelation function.....                              | S4         |
| <b>4- Experimental and simulation density and diffusion coefficient data.....</b> | <b>S5</b>  |
| <b>5- Radial distribution functions and coordination numbers.....</b>             | <b>S5</b>  |
| <b>6- Pore size distribution.....</b>                                             | <b>S8</b>  |
| <b>7- <i>MSD</i> of water .....</b>                                               | <b>S8</b>  |
| <b>8- Diffusion coefficient of methanol.....</b>                                  | <b>S9</b>  |
| <b>9- Subdiffusive behavior .....</b>                                             | <b>S10</b> |
| <b>10- Calculation method of residence time .....</b>                             | <b>S11</b> |

## 1- DFT calculations

### 1-1 Calculation method of partial charges

Polymer chains contain 20 monomers (both functionalized and non-functionalized). For partial charge calculations, by using DFT, a tetramer with two neutral and two charged monomers in the center and the end has been assumed (see Figure S1). Monomers in the middle of a long (real) polymer chain are represented by the middle monomers of the tetramer. We have two types of monomers: charged (-1 e charge) and neutral (0 e charge). All partial charges of the tetramer's middle and end charged/neutral monomers are presented in Table S1.

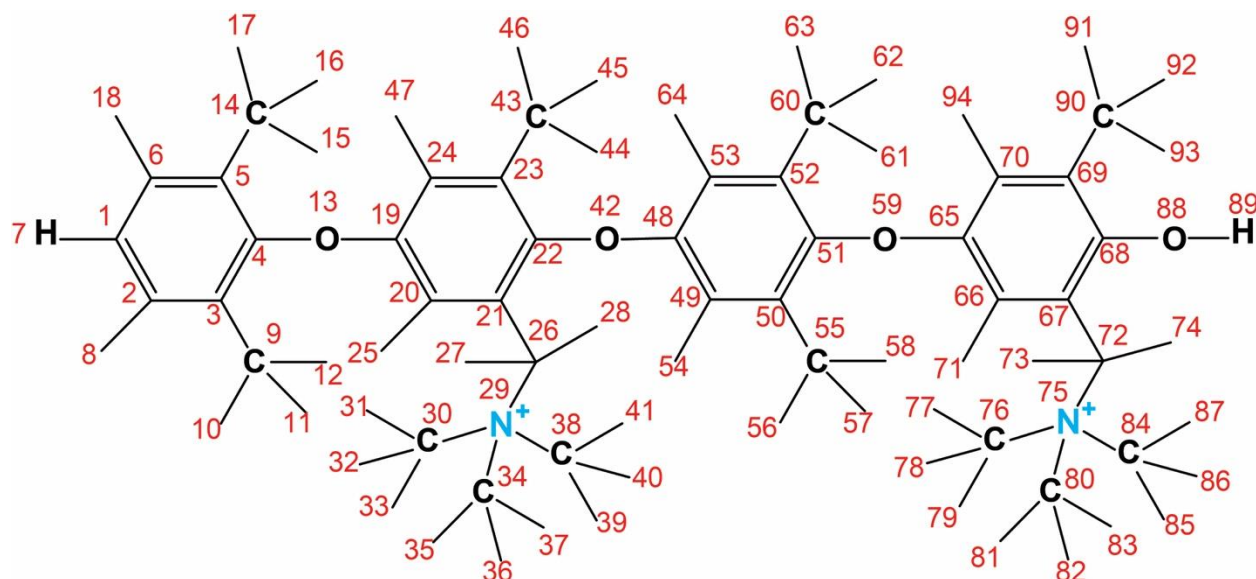

**Figure S1.** Schematic of a tetramer of an example structure for DFT calculation.

**Table S1.** Atomic partial charges for charged and neutral monomers as labeled in Fig S1.

| Atom Number | Atom | Partial Charge | Atom Number | Atom | Partial Charge | Atom Number | Atom | Partial Charge |
|-------------|------|----------------|-------------|------|----------------|-------------|------|----------------|
| 1           | C    | -0.022         | 33          | H    | 0.168          | 65          | C    | 0.233          |
| 2           | C    | -0.373         | 34          | C    | -0.402         | 66          | C    | -0.288         |
| 3           | C    | 0.248          | 35          | H    | 0.195          | 67          | C    | 0.069          |
| 4           | C    | 0.079          | 36          | H    | 0.195          | 68          | C    | 0.101          |
| 5           | C    | 0.289          | 37          | H    | 0.194          | 69          | C    | 0.151          |
| 6           | C    | -0.387         | 38          | C    | -0.402         | 70          | C    | -0.266         |
| 7           | H    | 0.148          | 39          | H    | 0.193          | 71          | H    | 0.163          |
| 8           | H    | 0.197          | 40          | H    | 0.189          | 72          | C    | -0.175         |
| 9           | C    | -0.304         | 41          | H    | 0.198          | 73          | H    | 0.169          |

|    |   |        |    |   |         |    |   |        |
|----|---|--------|----|---|---------|----|---|--------|
| 10 | H | 0.059  | 42 | O | -0.193  | 74 | H | 0.159  |
| 11 | H | 0.129  | 43 | C | -0.422  | 75 | N | 0.090  |
| 12 | H | 0.107  | 44 | H | 0.139   | 76 | C | -0.317 |
| 13 | O | -0.336 | 45 | H | 0.148   | 77 | H | 0.170  |
| 14 | C | -0.361 | 46 | H | 0.149   | 78 | H | 0.171  |
| 15 | H | 0.118  | 47 | H | 0.219   | 79 | H | 0.182  |
| 16 | H | 0.086  | 48 | C | 0.351   | 80 | C | -0.356 |
| 17 | H | 0.129  | 49 | C | -0.5097 | 81 | H | 0.211  |
| 18 | H | 0.194  | 50 | C | 0.320   | 82 | H | 0.211  |
| 19 | C | 0.458  | 51 | C | -0.0597 | 83 | H | 0.201  |
| 20 | C | -0.442 | 52 | C | 0.290   | 84 | C | -0.449 |
| 21 | C | 0.369  | 53 | C | -0.489  | 85 | H | 0.171  |
| 22 | C | -0.242 | 54 | H | 0.2001  | 86 | H | 0.190  |
| 23 | C | 0.359  | 55 | C | -0.3197 | 87 | H | 0.190  |
| 24 | C | -0.432 | 56 | H | 0.080   | 88 | O | -0.538 |
| 25 | H | 0.118  | 57 | H | 0.111   | 89 | H | 0.430  |
| 26 | C | -0.372 | 58 | H | 0.111   | 90 | C | -0.368 |
| 27 | H | 0.206  | 59 | O | -0.269  | 91 | H | 0.141  |
| 28 | H | 0.178  | 60 | C | -0.329  | 92 | H | 0.112  |
| 29 | N | 0.208  | 61 | H | 0.100   | 93 | H | 0.111  |
| 30 | C | -0.314 | 62 | H | 0.091   | 94 | H | 0.131  |
| 31 | H | 0.179  | 63 | H | 0.120   |    |   |        |
| 32 | H | 0.159  | 64 | H | 0.202   |    |   |        |

## 1-2 System size analysis

The water anomalous diffusion coefficient, density, and *PLD* of different simulation box sizes contained 20, 30, 40, 50, and 60 chains were compared. As can be seen, the specified qualities are not influenced by the system size; therefore, we believe that the finite size effect is negligible for boxes containing above 20 polymer chains. Note that boxes with 40 polymer chains were used for all the results shown in the paper.

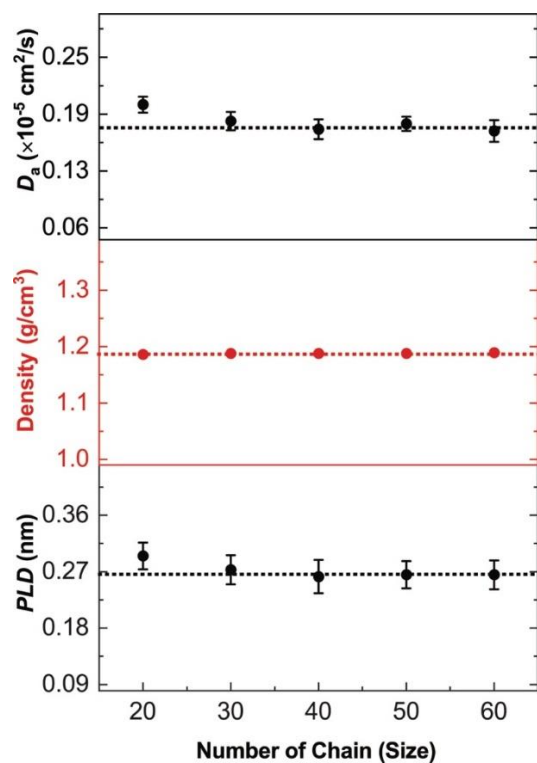

**Figure S2.** The anomalous diffusion coefficient ( $D_a$ ), Density, and  $PLD$  parameters for different system sizes of PPO-BTMA at  $\lambda = 5$ .

## 2- System compositions

Table S2 shows the polymer chain, water, and anion composition of each simulation box. Note that,  $\lambda$  is the number of water molecules per cationic group.

**Table S2.** Number of polymer chains, anion, and hydration level for each simulation box

| Sample    | Number of polymer chains | $\lambda$ | Number of water molecules | Number of $\text{Br}^-$ |
|-----------|--------------------------|-----------|---------------------------|-------------------------|
| PPO-BTMA  | 40                       | 2-15      | 640-4800                  | 320                     |
| PPO-QC6   | 40                       | 2-15      | 640-4800                  | 320                     |
| PPO-QC10  | 40                       | 2-15      | 640-4800                  | 320                     |
| PPO-QC16  | 40                       | 2-15      | 640-4800                  | 320                     |
| PPO-C8QC8 | 40                       | 2-15      | 640-4800                  | 320                     |
| PPO-C16Q  | 40                       | 2-15      | 640-4800                  | 320                     |

### 3- System equilibration

#### 3-1 Equilibration process for hydrated membranes

For the equilibration process, we, initially, selected membranes with the maximum degree of hydration ( $\lambda = 15$ ) and then put them under the minimization process by using the steepest descent algorithm to minimize the potential energy of the system. After that, a 5 ns simulation was performed (in NPT) to achieve a compressed box with a constant density. In the next step, the annealing procedure was applied to the simulation boxes, during which the temperature of the simulation box rose to 1000K in a period of 10 ns allowing the hydrated membrane for further relaxation. Once the box temperature reached the defined temperature, the box cooled down to 295 K in a four-step process (200 K each step and 105 K for the last step over 3 ns for each step). In the next stage, annealed simulation box underwent another 5 ns MD simulation (in NPT) again to maintain constant pressure and temperature. A Time step of 1 fs was chosen for all relaxation procedures. After the equilibration process, a production run of 100 ns with a time step of 2 fs was conducted (in NPT).

#### 3-2 Radius of the gyration autocorrelation function

The squared radius of gyration autocorrelation function is presented in Fig S3 for randomly selected membranes at  $\lambda = 15$ , with the dotted line serving as a visual cue to the zero point. The squared radius of gyration autocorrelation function of all samples converges before 13 ns, indicating that the simulation time (100 ns) is long enough to result in equilibrated membranes. The calculations were carried out up to 100 ns, however, only the results up to 50 ns are reported because the ACF oscillations after 50 ns.

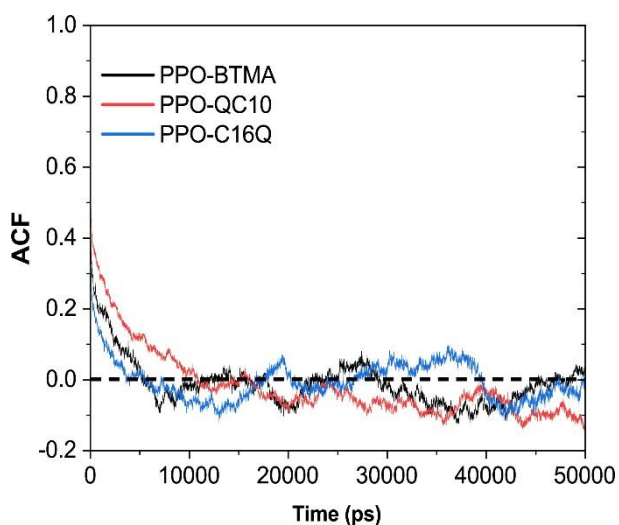

**Figure S3.** Autocorrelation function of the squared radius of gyration at  $\lambda = 15$  for different membranes.

#### 4- Experimental and simulation density and diffusion coefficient data

To be confident that the selected force field and method of simulation reproduce the main features of our membranes, we calculated the density of dried membranes and simulation diffusion coefficient data of hydrated membranes and compared those with the experimental ones from the work of Thieu et al <sup>1</sup>. Table S3 compares the density data of the simulations with the corresponding experimental ones.

**Table S3.** Sample densities of simulation and experiment<sup>1</sup>

| Sample   | Density (Experimental)<br>g/cm <sup>3</sup> | Density (Simulation)<br>g/cm <sup>3</sup> | % Error |
|----------|---------------------------------------------|-------------------------------------------|---------|
| PPO-BTMA | 1.25                                        | 1.19                                      | 4.8     |
| PPO-QC6  | 1.15                                        | 1.11                                      | 3.47    |
| PPO-QC10 | 1.13                                        | 1.07                                      | 5.31    |
| PPO-QC16 | 1.12                                        | 1.052                                     | 6.07    |

Figure S4 demonstrates the self-diffusion data of experiments and anomalous diffusion coefficient of simulations for PPO-QA membranes. As shown, simulation data follow a very similar trend compared to experiment diffusion data.

**Table S4.** Self-diffusion coefficient of PPO-QA with different side-chain lengths, experiment, and simulation. Note that  $D \propto (10^{-5} \text{ cm}^2/\text{s})$ .

| AEM-BTMA           |              |            |         |
|--------------------|--------------|------------|--------|--------------------|--------------|------------|--------|--------------------|--------------|------------|--------|--------------------|--------------|------------|---------|
| Experiment         |              | Simulation |         |
| $\lambda(\approx)$ | $D(\approx)$ | $\lambda$  | $D_a$   |
| 5.2                | 0.19         | 2          | 0.099  | 3.75               | 0.03         | 2          | 0.0218 | 3.8                | 0.01         | 2          | 0.0122 | 3.2                | 0.01         | 2          | 0.0179  |
| 6.5                | 0.23         | 4          | 0.1479 | 3.85               | 0.04         | 4          | 0.0401 | 4                  | 0.01         | 4          | 0.0122 | 3.3                | 0.015        | 4          | 0.0309  |
| 7.3                | 0.24         | 5          | 0.1823 | 5.3                | 0.06         | 5          | 0.052  | 5.2                | 0.02         | 5          | 0.016  | 4.5                | 0.02         | 5          | 0.0255  |
| 8                  | 0.28         | 6          | 0.1967 | 5.7                | 0.075        | 6          | 0.083  | 6.2                | 0.03         | 6          | 0.0503 | 8                  | 0.045        | 6          | 0.0244  |
|                    |              | 8          | 0.2615 |                    |              | 8          | 0.1583 |                    |              | 8          | 0.13   |                    |              | 8          | 0.059   |
|                    |              | 10         | 0.3973 |                    |              | 10         | 0.2722 |                    |              | 10         | 0.2234 |                    |              | 10         | 0.12061 |
|                    |              | 12         | 0.523  |                    |              | 12         | 0.3869 |                    |              | 12         | 0.3684 |                    |              | 12         | 0.22038 |
|                    |              | 14         | 0.665  |                    |              | 14         | 0.4961 |                    |              | 14         | 0.4969 |                    |              | 14         | 0.3192  |
|                    |              | 15         | 0.71   |                    |              | 15         | 0.5236 |                    |              | 15         | 0.5138 |                    |              | 15         | 0.4711  |

#### 5- Radial distribution functions and coordination numbers

Radial distribution functions and coordination numbers of Nitrogen-Nitrogen (QA groups), Nitrogen-Oxygen (water), Oxygen (water)-Oxygen (Water), Nitrogen (QA)- Br<sup>-</sup> at different hydration levels for PPO-QA membranes with different extender length (n = 0, 6, 10, 16) are presented in Figure S5. As shown,  $g_{N-N}(r)$  of all membranes decrease in high and move to longer distance due to the density of water molecules surrounding QA groups and push them to

farther distances. On the other hand,  $g_{N-Ow}(r)$  peaks of the membranes show a decreasing behavior as a result of the solvation effect. The internal structure of water molecules is analyzed using  $g_{Ow-Ow}(r)$  to study the three-dimensional structure of the water phase. It is concluded that water molecules are surrounded by more water molecules as hydration increases and the internal structure of water is more packed. Finally,  $g_{N-Br}(r)$  peak height decreases with an increase in hydration, indicating that water molecules surround cationic groups and push anions to longer distances and decrease the accessibility of anions to cationic groups.

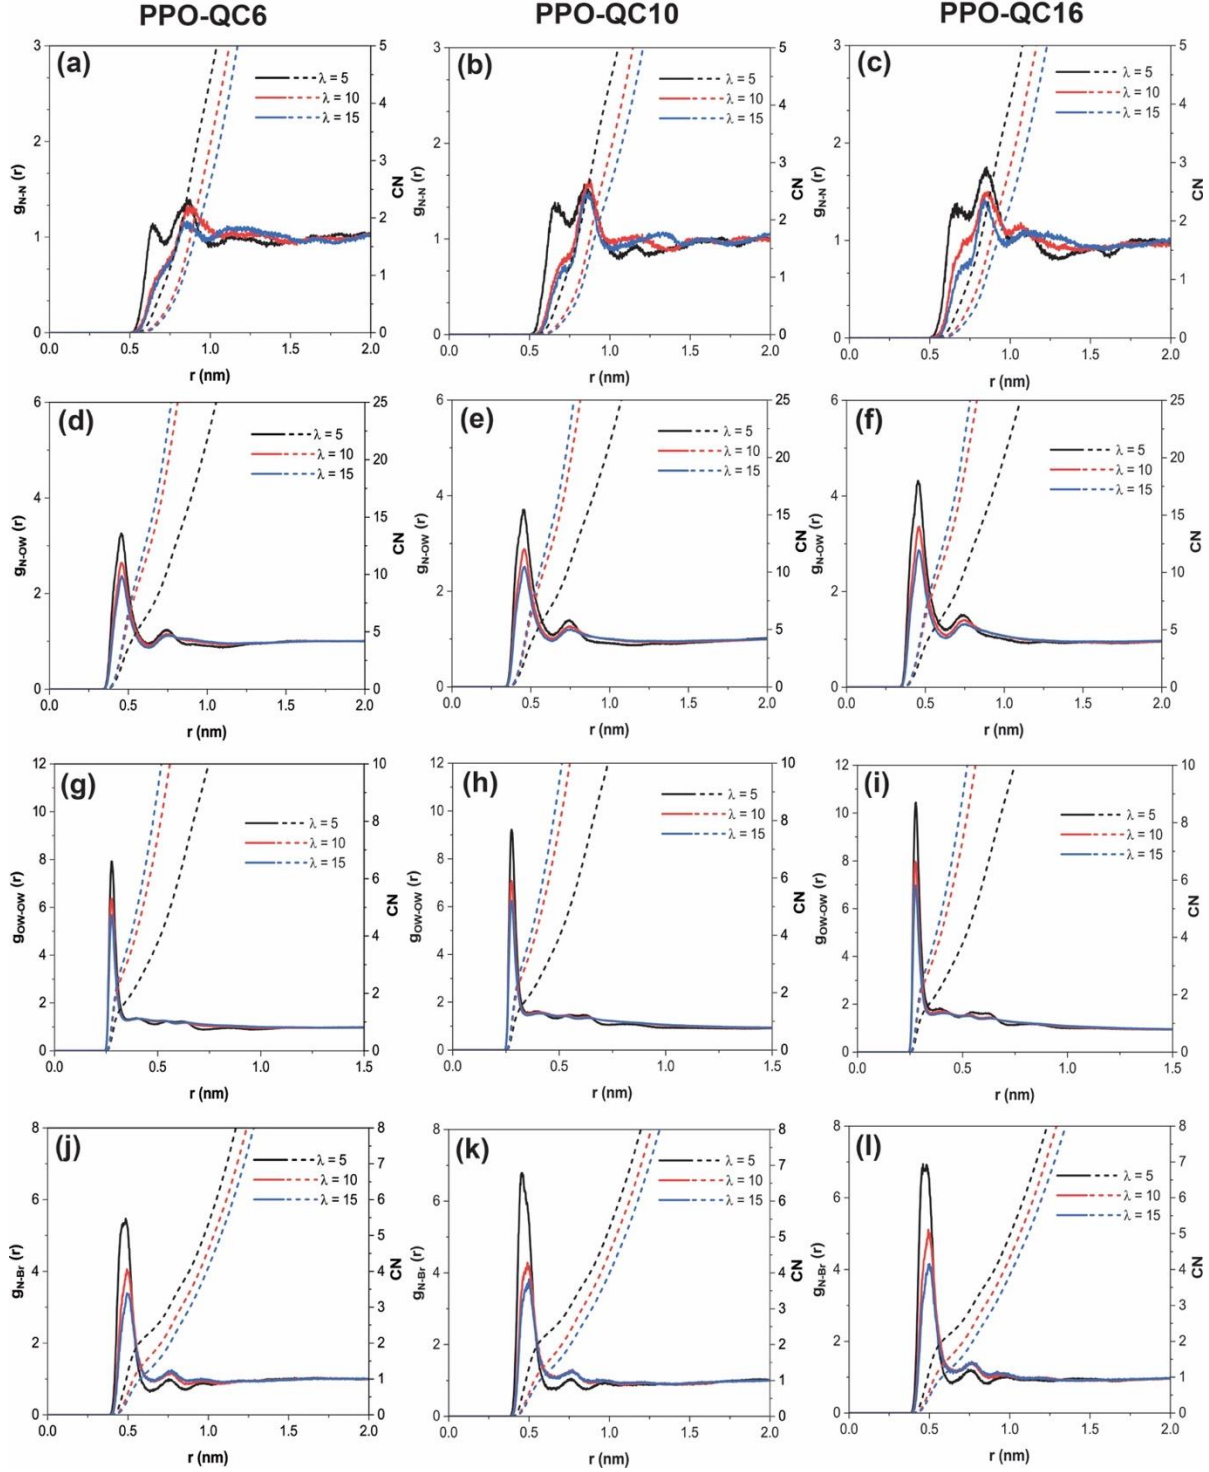

**Figure S4.** (a), (b), (c)  $g_{N-N}(r)$  and CN, (d), (e), (f)  $g_{N-OW}(r)$  and CN, (g), (h), (i)  $g_{OW-OW}(r)$  and CN for, (j), (k), (l)  $g_{N-Br}(r)$  and CN for different membranes at various hydration levels.

## 6- Pore size distribution

Figure S6 represents the *PSD* of membranes at various hydration levels. It is evident that all samples show a high peak at around 0.36 nm which shifts to right at higher hydration levels.

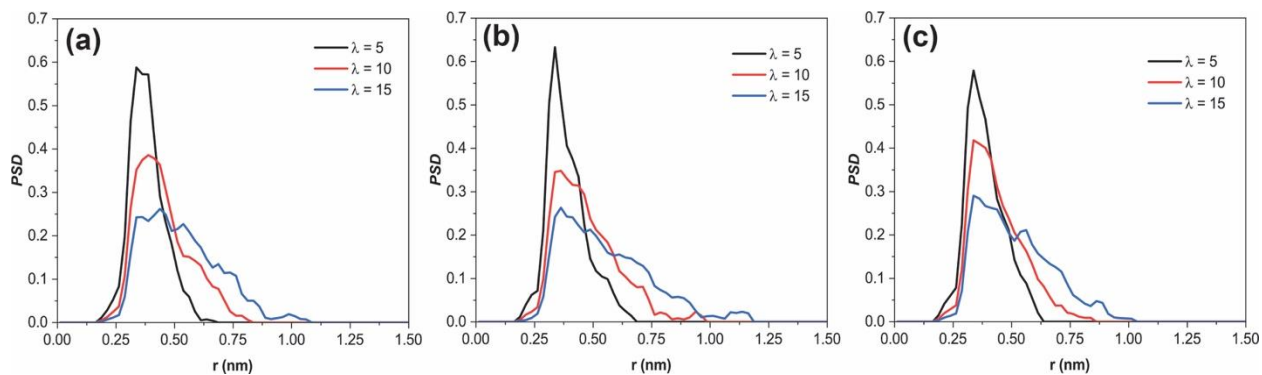

**Figure S5.** Pore size distribution (PSD) of (a) PPO-QC6 and (b) PPO-QC10 and (c) PPO-QC16 membranes at different hydration levels.

## 7- MSD of water

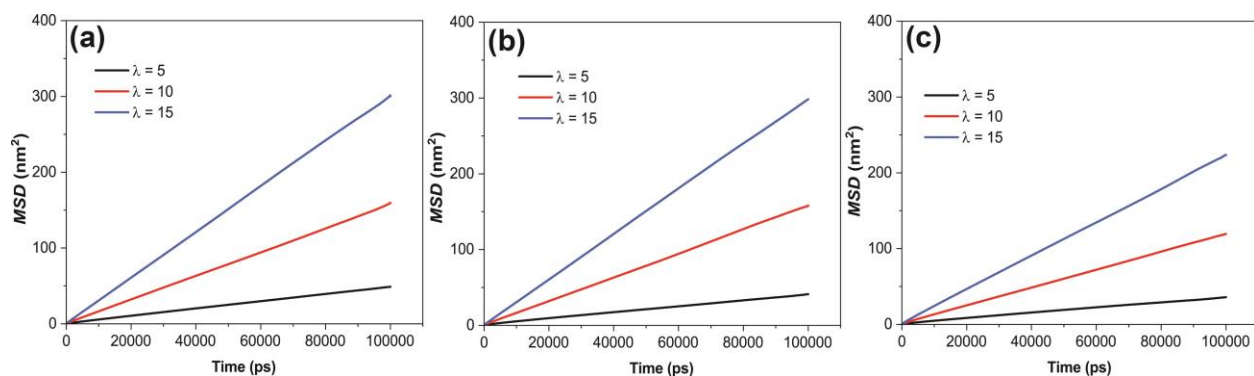

**Figure S6.** MSD of (a) PPO-QC6 and (b) PPO-QC10 and (c) PPO-QC16 membranes at different hydration levels.

## 8- Diffusion coefficient of methanol

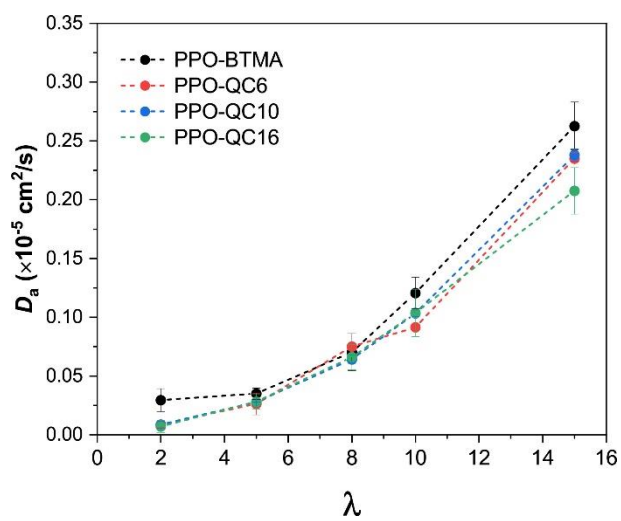

Figure S7. Diffusion coefficient ( $D_a$ ) of methanol as a function of  $\lambda$

## 9- Subdiffusive behavior

The diffusive behavior of all samples at different hydration levels is shown in Fig S8. As shown, different membranes show different diffusive behavior under different conditions. All samples show a subdiffusive behavior very far from normal diffusion at  $\lambda = 5$ , while diffusion behavior is closer to the normal regime at  $\lambda = 15$  for all membranes.

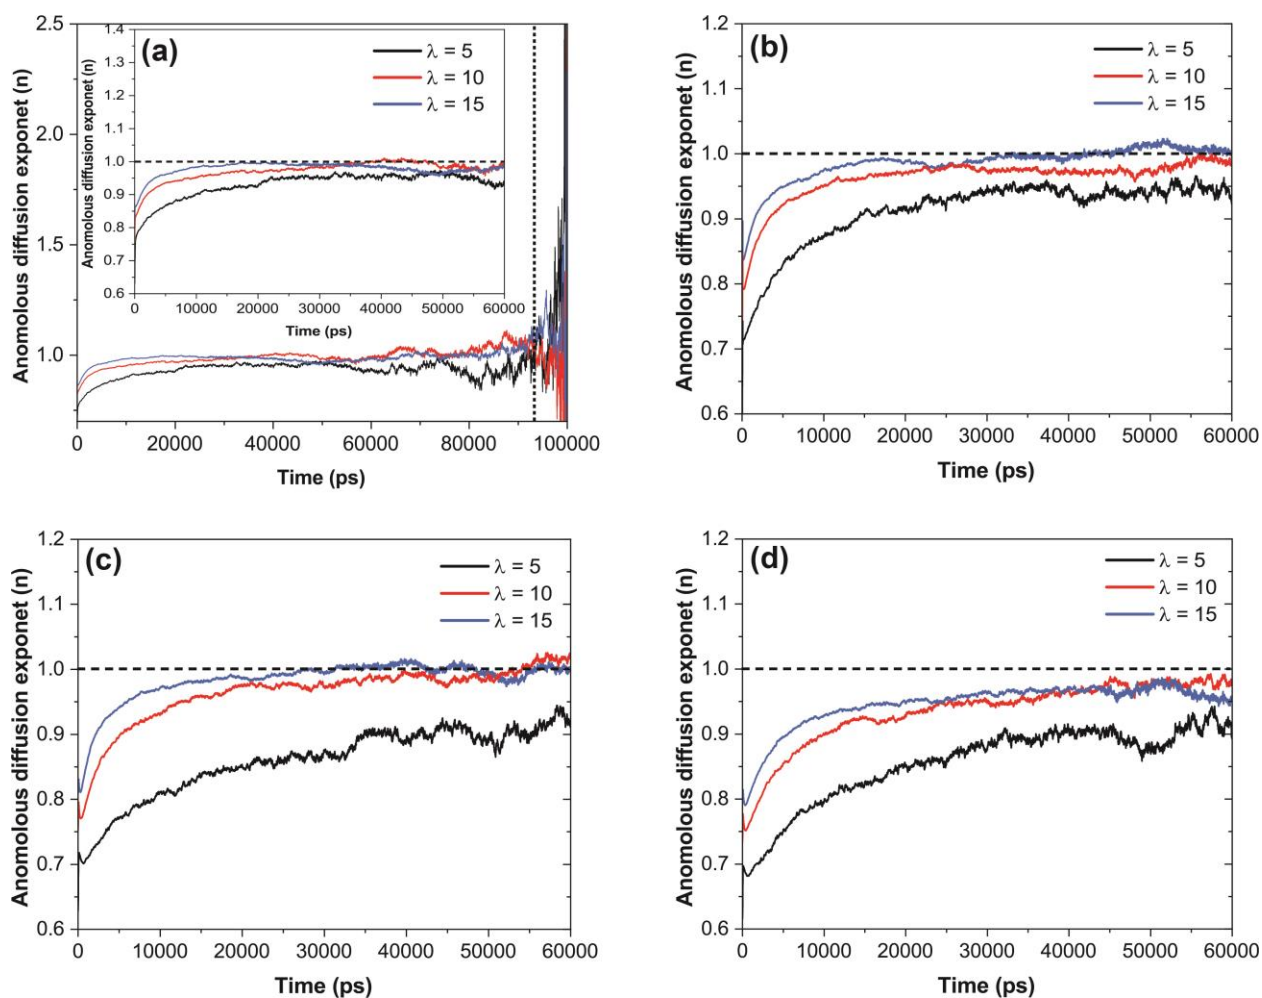

**Figure S8.** Subdiffusive exponent as a function of time for (a) PPO-QC6, (b) PPO-QC10 (c) PPO-QC16

## 10- Calculation method of residence lifetime

Residence time autocorrelation function ( $C_{res}(t)$ ) is shown as <sup>2,3</sup>.

$$C_{res}(t) = \frac{\langle g(0)g(t) \rangle}{\langle g(0)^2 \rangle}$$

where  $g(t) = 1$  if the water molecule is within the first hydration shell and  $g(t) = 0$  if the water molecule is outside the shell. To obtain residence time, the calculated residence time autocorrelation function of water is fitted with a three exponential function which gives more reliable results<sup>3</sup>.

$$C_{res}(t) = a_1 \exp(-t/\tau_1) + a_2 \exp(-t/\tau_2) + a_3 \exp(-t/\tau_3)$$

where  $a_3 = 1 - a_2 - a_1$  and  $\tau_3$  is the residence time of the water molecule in the first hydration shell.

## References

- (1) Thieu, L. M.; Zhu, L.; Korovich, A. G.; Hickner, M. A.; Madsen, L. A. Multiscale Tortuous Diffusion in Anion and Cation Exchange Membranes. *Macromolecules* **2018**, *52* (1), 24–35.
- (2) Reddy, T. D. N.; Mallik, B. S. Heterogeneity in the Microstructure and Dynamics of Tetraalkylammonium Hydroxide Ionic Liquids: Insight from Classical Molecular Dynamics Simulations and Voronoi Tessellation Analysis. *Physical Chemistry Chemical Physics* **2020**, *22* (6), 3466–3480.
- (3) Skarmoutsos, I.; Welton, T.; Hunt, P. A. The Importance of Timescale for Hydrogen Bonding in Imidazolium Chloride Ionic Liquids. *Physical Chemistry Chemical Physics* **2014**, *16* (8), 3675–3685.
